# Supplementary material for: Genome-Wide Identification, Evolution, and Expression of GDSL-Type Esterase/Lipase Gene Family in Soybean
Source: Front Plant Sci. 2020 Jun 25;11:726. doi: 10.3389/fpls.2020.00726 (PMC7332888; doi:10.3389/fpls.2020.00726)
Supplement: TABLE S1 — Description of soybean GELP genes. [file Table_1.XLSX]

## Sheet: Sheet1
Table S1. Description of soybean GELP genes.
Gene Name	Photozome Soybean Gene ID	GenBank ID	Group	Intron NO.	Protein Length	Genome Location	+/- stand
GmGELP1	Glyma.01G067200	KRH75172.1	C	4	358	chr1:10956610-10960136	-
GmGELP2	Glyma.01G106900	KRH75758.1	F	4	363	chr1:36500247-36504865	-
GmGELP3	Glyma.01G122000	KRH75978.1	K	5	246	chr1:41905974-41909844	+
GmGELP4	Glyma.01G181600	KRH76920.1	D	4	374	chr1:51738422-51740622	-
GmGELP5	Glyma.01G226300	KRH77662.1	I	4	386	chr1:55477180-55479551	+
GmGELP6	Glyma.02G043300	KRH69705.1	D	4	369	chr2:4044992-4048922	+
GmGELP7	Glyma.02G046000	KRH69753.1	I	4	365	chr2:4231654-4234335	-
GmGELP8	Glyma.02G046500	KRH69760.1	I	4	362	chr2:4266744-4269200	+
GmGELP9	Glyma.02G062600	KRH70016.1	D	4	373	chr2:5645621-5648965	+
GmGELP10	Glyma.02G124000	KRH71014.1	C	4	355	chr2:12384604-12387478	-
GmGELP11	Glyma.02G232200	KRH72761.1	I	2	356	chr2:41921782-41924880	-
GmGELP12	Glyma.02G232400	KRH72763.1	I	2	364	chr2:41945480-41947262	-
GmGELP13	Glyma.02G244900	KRH72988.1	D	5	352	chr2:43297348-43300008	-
GmGELP14	Glyma.02G264100	KRH73274.1	I	2	359	chr2:44939573-44941621	-
GmGELP15	Glyma.02G266600	KRH73314.1	I	2	350	chr2:45117663-45121400	+
GmGELP16	Glyma.02G266700	KRH73315.1	I	2	358	chr2:45131059-45134696	+
GmGELP17	Glyma.02G273900	KRH73441.1	I	2	377	chr2:45708441-45710219	+
GmGELP18	Glyma.03G006200	KRH64954.1	A	4	326	chr3:579661-582201	+
GmGELP19	Glyma.03G058000	KRH65731.1	K	5	271	chr3:8249390-8252886	+
GmGELP20	Glyma.03G169800	KRH67510.1	F	4	322	chr3:38455664-38460712	+
GmGELP21	Glyma.03G193600	KRH67892.1	J	3	350	chr3:40449553-40453538	-
GmGELP22	Glyma.03G229600	KRH68416.1	A	4	363	chr3:43158099-43161371	-
GmGELP23	Glyma.03G240300	KRH68596.1	A	5	458	chr3:43903586-43906225	-
GmGELP24	Glyma.03G252500	KRH68816.1	F	4	376	chr3:44819920-44825163	+
GmGELP25	Glyma.03G252600	KRH68817.1	F	4	365	chr3:44830497-44833487	+
GmGELP26	Glyma.03G252700	KRH68818.1	F	4	365	chr3:44841960-44844706	+
GmGELP27	Glyma.03G252800	KRH68819.1	F	4	365	chr3:44849419-44851672	+
GmGELP28	Glyma.03G254900	KRH68859.1	A	4	380	chr3:45003320-45006452	-
GmGELP29	Glyma.03G263900	KRH69020.1	B	5	350	chr3:45669353-45670901	+
GmGELP30	Glyma.04G022800	KRH61019.1	I	4	357	chr4:1789810-1791950	-
GmGELP31	Glyma.04G022900	KRH61020.1	I	4	364	chr4:1795307-1799207	-
GmGELP32	Glyma.04G023000	KRH61021.1	I	2	160	chr4:1815099-1816361	-
GmGELP33	Glyma.04G109900	KRH62452.1	F	4	372	chr4:11906692-11912922	-
GmGELP34	Glyma.04G168500	KRH63326.1	D	4	367	chr4:42248937-42254258	-
GmGELP35	Glyma.04G178700	KRH63467.1	A	2	150	chr4:44320450-44334801	+
GmGELP36	Glyma.04G199600	KRH63839.1	A	4	372	chr4:47178830-47180705	-
GmGELP37	Glyma.04G255500	KRH64795.1	E	4	369	chr4:52197612-52201472	+
GmGELP38	Glyma.04G255600	KRH64796.1	F	4	370	chr4:52200630-52203870	-
GmGELP39	Glyma.05G007700	KRH56613.1	A	4	379	chr5:724769-728554	+
GmGELP40	Glyma.05G026100	KRH56905.1	D	4	368	chr5:2276426-2278856	-
GmGELP41	Glyma.05G038400	KRH57081.1	K	5	251	chr5:3410511-3415753	+
GmGELP42	Glyma.05G044600	KRH57186.1	A	1	380	chr5:3985405-3987297	+
GmGELP43	Glyma.05G116300	KRH58258.1	F	4	372	chr5:30898571-30900815	+
GmGELP44	Glyma.05G163300	KRH59046.1	G	4	366	chr5:35445994-35448677	-
GmGELP45	Glyma.05G163400	KRH59047.1	G	4	366	chr5:35454762-35457417	-
GmGELP46	Glyma.06G022700	KRH51680.1	I	4	357	chr6:1690335-1692895	-
GmGELP47	Glyma.06G022800	KRH51682.1	I	4	364	chr6:1697328-1701424	-
GmGELP48	Glyma.06G022900	KRH51683.1	I	3	286	chr6:1710750-1715707	-
GmGELP49	Glyma.06G161800	KRH54041.1	H	4	389	chr6:13371616-13374814	-
GmGELP50	Glyma.06G184700	KRH54432.1	A	4	295	chr6:16011413-16012941	-
GmGELP51	Glyma.06G194500	KRH54563.1	D	4	367	chr6:17327580-17330736	+
GmGELP52	Glyma.06G251400	KRH55383.1	J	1	165	chr6:42624934-42626211	+
GmGELP53	Glyma.06G251900	KRH55388.1	J	1	160	chr6:42764422-42765684	+
GmGELP54	Glyma.06G287400	KRH55870.1	G	4	360	chr6:47628185-47631466	+
GmGELP55	Glyma.06G294700	KRH55990.1	I	4	365	chr6:48369883-48371815	+
GmGELP56	Glyma.06G294800	KRH55991.1	I	4	362	chr6:48376832-48379482	+
GmGELP57	Glyma.06G294900	KRH55993.1	I	4	362	chr6:48390348-48393176	+
GmGELP58	Glyma.06G324100	KRH56454.1	F	4	370	chr6:51179208-51181752	+
GmGELP59	Glyma.06G324200	KRH56456.1	E	5	381	chr6:51182160-51185482	-
GmGELP60	Glyma.07G014100	KRH47191.1	I	4	353	chr7:1106615-1108357	+
GmGELP61	Glyma.07G044100	KRH47690.1	B	4	366	chr7:3667352-3670363	-
GmGELP62	Glyma.07G044200	KRH47691.1	B	4	376	chr7:3675687-3681153	-
GmGELP63	Glyma.07G060500	KRH47982.1	A	4	389	chr7:5378706-5383359	+
GmGELP64	Glyma.07G150000	KRH49377.1	K	4	223	chr7:18010576-18012149	+
GmGELP65	Glyma.07G150200	KRH49381.1	K	5	254	chr7:18040341-18046135	-
GmGELP66	Glyma.07G150300	KRH49382.1	K	5	255	chr7:18048674-18058235	-
GmGELP67	Glyma.07G150400	KRH49384.1	K	4	230	chr7:18075263-18078864	-
GmGELP68	Glyma.07G203200	KRH50140.1	I	4	368	chr7:37250076-37254583	+
GmGELP69	Glyma.07G239400	KRH50721.1	D	4	369	chr7:42024977-42027134	-
GmGELP70	Glyma.08G120700	KRH42932.1	G	4	367	chr8:9317877-9320594	-
GmGELP71	Glyma.08G131700	KRH43114.1	A	3	399	chr8:10091227-10093535	+
GmGELP72	Glyma.08G199500	KRH44252.1	I	4	365	chr8:16120453-16122943	+
GmGELP73	Glyma.08G307200	KRH46013.1	I	2	350	chr8:42536858-42541673	-
GmGELP74	Glyma.08G318400	KRH46208.1	D	4	366	chr8:43775538-43779231	+
GmGELP75	Glyma.09G035000	KRH36964.1	D	4	369	chr9:2929834-2932174	-
GmGELP76	Glyma.09G074000	KRH37563.1	B	4	407	chr9:7924556-7927259	-
GmGELP77	Glyma.09G233900	KRH40028.1	H	4	460	chr9:45644100-45646135	+
GmGELP78	Glyma.09G241400	KRH40147.1	F	4	371	chr9:46370634-46374320	-
GmGELP79	Glyma.10G042500	KRH32284.1	F	4	367	chr10:3792775-3797659	+
GmGELP80	Glyma.10G070500	KRH32721.1	J	3	359	chr10:7068556-7072525	-
GmGELP81	Glyma.10G076500	KRH32795.1	A	4	360	chr10:7972907-7974452	-
GmGELP82	Glyma.10G157200	KRH33989.1	A	4	377	chr10:39142619-39145615	-
GmGELP83	Glyma.10G168400	KRH34177.1	F	4	364	chr10:40264251-40266686	+
GmGELP84	Glyma.10G168500	KRH34178.1	F	4	371	chr10:40272043-40274432	+
GmGELP85	Glyma.10G203300	KRH34746.1	J	4	340	chr10:43466600-43469861	-
GmGELP86	Glyma.10G203400	KRH34747.1	J	4	345	chr10:43470820-43474509	-
GmGELP87	Glyma.11G059800	KRH28533.1	D	4	374	chr11:4522087-4524202	-
GmGELP88	Glyma.11G079400	KRH28830.1	I	4	366	chr11:5968738-5974185	+
GmGELP89	Glyma.11G190600	KRH30531.1	I	4	353	chr11:26312017-26325741	+
GmGELP90	Glyma.11G197700	KRH30643.1	K	2	133	chr11:27409382-27410356	+
GmGELP91	Glyma.11G209900	KRH30847.1	J	3	357	chr11:30188618-30192948	-
GmGELP92	Glyma.11G229500	KRH31138.1	K	5	256	chr11:32490484-32499116	+
GmGELP93	Glyma.12G083900	KRH25150.1	I	4	306	chr12:6695874-6697458	-
GmGELP94	Glyma.12G180200	KRH26558.1	I	4	350	chr12:34061073-34062960	-
GmGELP95	Glyma.13G026300	KRH17906.1	I	2	349	chr13:5665250-5670585	-
GmGELP96	Glyma.13G044500	KRH18212.1	F	4	370	chr13:13792197-13794068	+
GmGELP97	Glyma.13G045100	KRH18221.1	F	4	370	chr13:13883277-13885522	-
GmGELP98	Glyma.13G079300	RCW19078.1	A	2	199	chr13:18600536-18601534	+
GmGELP99	Glyma.13G079700	KRH18733.1	A	4	336	chr13:18613446-18616026	+
GmGELP100	Glyma.13G129900	KRH19681.1	F	4	372	chr13:24269818-24273919	+
GmGELP101	Glyma.13G171300	KRH20334.1	K	4	241	chr13:28543595-28547447	+
GmGELP102	Glyma.13G172500	KRH20355.1	I	4	369	chr13:28644819-28649188	-
GmGELP103	Glyma.13G223000	KRH21145.1	G	4	360	chr13:33586390-33589913	+
GmGELP104	Glyma.13G223100	KRH21147.1	G	4	375	chr13:33601435-33604296	+
GmGELP105	Glyma.13G231300	KRH21298.1	A	4	392	chr13:34299255-34301603	-
GmGELP106	Glyma.13G231400	KRH21299.1	A	4	400	chr13:34305447-34309209	-
GmGELP107	Glyma.13G231500	KRH21302.1	A	4	378	chr13:34310207-34314155	-
GmGELP108	Glyma.13G231800	KRH21309.1	A	4	384	chr13:34328182-34331758	-
GmGELP109	Glyma.13G232200	KRH21313.1	K	4	243	chr13:34342771-34347885	+
GmGELP110	Glyma.13G233600	KRH21335.1	I	4	363	chr13:34433218-34438675	+
GmGELP111	Glyma.13G233700	KRH21336.1	I	4	366	chr13:34443302-34449715	-
GmGELP112	Glyma.13G320600	KRH22750.1	I	6	425	chr13:41494194-41497001	+
GmGELP113	Glyma.13G353100	KRH23361.1	I	4	353	chr13:44189998-44191915	+
GmGELP114	Glyma.14G022500	KRH14383.1	D	4	362	chr14:1594167-1598135	-
GmGELP115	Glyma.14G050900	KRH14825.1	I	2	358	chr14:3977944-3980627	-
GmGELP116	Glyma.14G051000	KRH14826.1	I	2	346	chr14:3992270-3996654	-
GmGELP117	Glyma.14G150100	KRH16342.1	A	4	424	chr14:32376200-32378594	-
GmGELP118	Glyma.14G150200	KRH16343.1	A	4	392	chr14:32449406-32452305	-
GmGELP119	Glyma.14G164100	KRH16590.1	A	2	181	chr14:40434894-40435912	-
GmGELP120	Glyma.14G214100	RCW19053.1	D	5	336	chr14:47899920-47902239	+
GmGELP121	Glyma.14G220600	KRH17460.1	I	4	362	chr14:48558601-48564791	+
GmGELP122	Glyma.14G220700	KRH17461.1	I	4	368	chr14:48572636-48577577	+
GmGELP123	Glyma.14G220800	KRH17462.1	I	4	367	chr14:48578569-48582872	+
GmGELP124	Glyma.14G220900	KRH17463.1	I	4	363	chr14:48592892-48598253	+
GmGELP125	Glyma.14G221000	KRH17466.1	I	5	367	chr14:48602116-48603776	+
GmGELP126	Glyma.15G021200	KRH09971.1	I	5	342	chr15:1633562-1635026	-
GmGELP127	Glyma.15G079300	KRH10964.1	I	4	366	chr15:6095770-6103591	+
GmGELP128	Glyma.15G079500	KRH10966.1	I	4	356	chr15:6105499-6110385	-
GmGELP129	Glyma.15G080500	KRH10984.1	K	4	242	chr15:6166626-6171449	-
GmGELP130	Glyma.15G080900	KRH10993.1	A	4	402	chr15:6185908-6190221	+
GmGELP131	Glyma.15G081000	KRH10994.1	A	4	391	chr15:6191942-6196218	+
GmGELP132	Glyma.15G081300	KRH10999.1	A	4	374	chr15:6211557-6213959	+
GmGELP133	Glyma.15G088900	KRH11099.1	G	4	375	chr15:6840247-6843393	-
GmGELP134	Glyma.15G089000	KRH11100.1	G	4	382	chr15:6844050-6846520	-
GmGELP135	Glyma.15G089100	KRH11101.1	G	4	348	chr15:6853145-6857094	-
GmGELP136	Glyma.15G089200	KRH11102.1	G	4	371	chr15:6861152-6864731	-
GmGELP137	Glyma.15G089300	RCW19003.1	G	4	364	chr15:6871510-6874512	-
GmGELP138	Glyma.15G139600	KRH11929.1	D	4	385	chr15:11395910-11399354	-
GmGELP139	Glyma.15G139700	KRH11933.1	D	4	369	chr15:11406164-11408561	-
GmGELP140	Glyma.15G182900	KRH12619.1	B	4	397	chr15:18020785-18023088	-
GmGELP141	Glyma.15G183000	KRH12620.1	B	4	403	chr15:18032794-18035210	-
GmGELP142	Glyma.15G264200	KRH13793.1	B	4	369	chr15:49844076-49848069	-
GmGELP143	Glyma.15G264300	KRH13794.1	B	4	369	chr15:49856796-49861158	-
GmGELP144	Glyma.16G012400	KRH06260.1	B	4	272	chr16:1064975-1066398	-
GmGELP145	Glyma.16G012500	KRH06261.1	B	4	376	chr16:1070403-1075202	-
GmGELP146	Glyma.16G029100	KRH06538.1	A	4	388	chr16:2789647-2792632	+
GmGELP147	Glyma.16G068700	KRH07110.1	A	4	387	chr16:6829983-6834225	+
GmGELP148	Glyma.16G068800	KRH07111.1	A	4	385	chr16:6851628-6857566	+
GmGELP149	Glyma.16G068900	KRH07113.1	A	4	382	chr16:6863088-6866213	+
GmGELP150	Glyma.16G099200	KRH07623.1	K	4	223	chr16:19094363-19096176	-
GmGELP151	Glyma.16G120300	KRH07949.1	D	4	367	chr16:26830987-26834111	+
GmGELP152	Glyma.16G124000	KRH08023.1	I	3	292	chr16:27338295-27339879	-
GmGELP153	Glyma.16G124200	KRH08025.1	I	4	366	chr16:27365809-27368331	-
GmGELP154	Glyma.16G144900	KRH08372.1	D	4	373	chr16:30549575-30553059	+
GmGELP155	Glyma.17G034000	KRH02363.1	D	4	369	chr17:2489617-2491715	+
GmGELP156	Glyma.17G088700	KRH03279.1	K	4	247	chr17:6880928-6885512	-
GmGELP157	Glyma.17G100800	KRH03485.1	D	4	368	chr17:7926190-7929352	+
GmGELP158	Glyma.17G127000	KRH03905.1	A	1	380	chr17:10139989-10141799	+
GmGELP159	Glyma.17G166100	KRH04509.1	A	4	414	chr17:15158843-15162575	+
GmGELP160	Glyma.17G259500	KRH05976.1	I	4	372	chr17:41366036-41371219	+
GmGELP161	Glyma.17G259600	KRH05977.1	I	4	372	chr17:41379741-41389864	+
GmGELP162	Glyma.17G259700	KRH05978.1	I	4	377	chr17:41392813-41397100	+
GmGELP163	Glyma.17G259800	KRH05980.1	I	4	363	chr17:41407916-41413037	+
GmGELP164	Glyma.17G259900	KRH05981.1	I	4	366	chr17:41418307-41420497	+
GmGELP165	Glyma.18G027800	KRG97742.1	K	5	256	chr18:2074766-2080226	-
GmGELP166	Glyma.18G095100	KRG98739.1	D	4	359	chr18:9704195-9707617	-
GmGELP167	Glyma.18G110500	KRG98969.1	I	2	354	chr18:13060060-13065124	+
GmGELP168	Glyma.18G126900	KRG99180.1	J	1	170	chr18:16790533-16791777	+
GmGELP169	Glyma.18G201100	KRH00235.1	K	5	254	chr18:48076174-48080402	+
GmGELP170	Glyma.18G201300	KRH00237.1	K	5	239	chr18:48114759-48118825	-
GmGELP171	Glyma.18G201400	KRH00239.1	K	5	256	chr18:48122342-48125774	-
GmGELP172	Glyma.18G254800	KRH01113.1	F	4	371	chr18:54105105-54109820	+
GmGELP173	Glyma.19G008100	KRG93303.1	A	4	379	chr19:804376-808519	+
GmGELP174	Glyma.19G015600	KRG93429.1	A	4	290	chr19:1536852-1539286	-
GmGELP175	Glyma.19G036700	KRG93727.1	C	4	362	chr19:5097386-5103778	+
GmGELP176	Glyma.19G050000	KRG93924.1	F	4	370	chr19:8041442-8043389	+
GmGELP177	Glyma.19G050800	KRG93937.1	F	4	371	chr19:8235801-8238146	+
GmGELP178	Glyma.19G050900	KRG93938.1	F	4	370	chr19:8260579-8263243	-
GmGELP179	Glyma.19G051000	KRG93939.1	F	4	370	chr19:8296666-8298876	-
GmGELP180	Glyma.19G051100	KRG93940.1	F	4	370	chr19:8303420-8305784	-
GmGELP181	Glyma.19G053200	KRG93967.1	A	4	359	chr19:8614188-8615729	-
GmGELP182	Glyma.19G079700	KRG94370.1	B	4	365	chr19:28941182-28942957	-
GmGELP183	Glyma.19G120000	KRG94944.1	A	4	393	chr19:37727145-37731532	-
GmGELP184	Glyma.19G171000	KRG95792.1	F	3	205	chr19:43229301-43230858	+
GmGELP185	Glyma.19G193500	KRG96179.1	J	3	352	chr19:45118043-45121712	-
GmGELP186	Glyma.19G226900	KRG96697.1	A	4	364	chr19:47852651-47856677	-
GmGELP187	Glyma.19G237300	KRG96863.1	A	5	458	chr19:48631623-48635005	-
GmGELP188	Glyma.19G250000	KRG97072.1	F	4	376	chr19:49605823-49611059	+
GmGELP189	Glyma.19G250100	KRG97073.1	F	4	365	chr19:49616568-49619730	+
GmGELP190	Glyma.19G250400	KRG97077.1	F	4	370	chr19:49639900-49642287	+
GmGELP191	Glyma.19G262900	KRG97292.1	B	4	366	chr19:50553853-50555792	+
GmGELP192	Glyma.20G064000	KRG90047.1	J	1	175	chr20:21495430-21496741	+
GmGELP193	Glyma.20G221200	KRG92605.1	F	4	371	chr20:45616970-45619607	-
GmGELP194	Glyma.20G231500	KRG92818.1	A	5	297	chr20:46507897-46510398	+
