# Supplementary material for: Genome-Wide Identification, Evolution, and Expression of GDSL-Type Esterase/Lipase Gene Family in Soybean
Source: Front Plant Sci. 2020 Jun 25;11:726. doi: 10.3389/fpls.2020.00726 (PMC7332888; doi:10.3389/fpls.2020.00726)
Supplement: TABLE S5 — FPKM values under drought treatment of soybean GELP genes. [file Table_5.XLSX]

## Sheet: GH
Table S5. FPKM values under drought treatment of soybean GELP genes.
Gene ID	Gene Name	CK_treat-Expression	GH_treat-Expression	log2FoldChange(GH_treat/CK_treat)	Padj	Up/Down-Regulation	Pvalue
LOC100813037	GmGELP28	0.338697	66.5643	7.61861	3.06e-07	Up	1.46e-07
LOC100808367	GmGELP17	4.6386	192.871	5.3778	6.26e-26	Up	1.77e-26
LOC100776321	GmGELP8	0.283498	8.78134	4.95303	0.00601572	Up	0.00376845
LOC100790145	GmGELP74	193.842	2679.52	3.78902	0	Up	0
LOC100819379	GmGELP145	2.46046	16.1352	2.71321	0.00967585	Up	0.00618093
LOC100801228	GmGELP141	15.9324	43.4475	1.44731	0.00806431	Up	0.00511665
LOC100819510	GmGELP107	35.1032	79.7665	1.18418	0.00882644	Up	0.00561878
LOC100499873	GmGELP92	344.135	132.796	-1.37377	6.58e-17	Down	2.28e-17
LOC100784886	GmGELP23	162.226	61.4129	-1.40139	4.37e-08	Down	2e-08
LOC100805486	GmGELP116	248.266	93.1247	-1.41465	7.12e-12	Down	2.84e-12
LOC100782709	GmGELP156	341.595	91.5106	-1.90028	2.13e-24	Down	6.2e-25
LOC100817404	GmGELP131	184.662	47.8637	-1.94788	5.63e-13	Down	2.17e-13
LOC100787966	GmGELP58	564.484	137.369	-2.03888	3.27e-46	Down	6.57e-47
LOC100795716	GmGELP113	1524.7	359.814	-2.0832	1.07e-90	Down	1.29e-91
LOC100796902	GmGELP38	96.5047	21.8595	-2.14234	7.8e-07	Down	3.78e-07
LOC100803899	GmGELP71	274.693	54.1522	-2.34273	7.97e-22	Down	2.46e-22
LOC100785435	GmGELP173	429.739	84.6862	-2.34326	3.48e-39	Down	7.76e-40
LOC100783310	GmGELP187	147.174	28.0429	-2.39182	2.31e-12	Down	9.08e-13
LOC100782272	GmGELP39	45.0142	8.24492	-2.4488	0.000126314	Down	6.94e-05
LOC100789208	GmGELP91	123.128	21.2711	-2.53319	1.68e-10	Down	7.02e-11
LOC100791667	GmGELP42	690.796	109.688	-2.65486	2.17e-67	Down	3.35e-68
LOC100813414	GmGELP26	8043.98	1273.66	-2.65893	1.29e-265	Down	5.2e-267
LOC100775618	GmGELP89	99.5438	15.0323	-2.72727	2.12e-10	Down	8.91e-11
LOC100791711	GmGELP137	2674.48	388.005	-2.78511	9.83e-257	Down	4.16e-258
LOC100777186	GmGELP162	50.8839	6.00493	-3.08299	4.56e-06	Down	2.3e-06
LOC100817934	GmGELP132	524.897	59.7727	-3.13447	8.47e-63	Down	1.38e-63
LOC100820358	GmGELP19	789.56	89.2353	-3.14536	5.31e-91	Down	6.36e-92
LOC100797617	GmGELP186	816.601	87.0627	-3.2295	6.02e-80	Down	8.06e-81
LOC102667991	GmGELP16	526.913	55.8193	-3.23873	1.14e-65	Down	1.79e-66
LOC100812344	GmGELP24	4016.67	401.179	-3.32368	0	Down	0
LOC100813953	GmGELP27	130.209	12.2253	-3.41288	7.96e-15	Down	2.91e-15
LOC100815803	GmGELP129	524.072	42.7956	-3.61423	1.96e-66	Down	3.04e-67
LOC100790553	GmGELP22	754.476	59.8174	-3.65684	4.69e-90	Down	5.68e-91
LOC100788092	GmGELP185	371.046	28.0544	-3.7253	8.06e-48	Down	1.59e-48
LOC100812154	GmGELP18	4732.15	356.902	-3.7289	0	Down	0
LOC100810163	GmGELP158	4669.73	341.628	-3.77284	0	Down	0
LOC100780781	GmGELP176	1506.55	109.106	-3.78744	3.35e-188	Down	2.03e-189
LOC100819985	GmGELP183	777.055	53.5646	-3.85867	1.09e-101	Down	1.19e-102
LOC100799622	GmGELP133	526.763	35.9891	-3.87152	5.79e-69	Down	8.75e-70
LOC100818373	GmGELP21	1032.87	62.6889	-4.0423	1.07e-125	Down	9.61e-127
LOC100801497	GmGELP177	1862.05	94.3887	-4.30213	8.95e-227	Down	4.45e-228
LOC100802921	GmGELP179	646.519	31.499	-4.35932	6.11e-74	Down	8.71e-75
LOC100805853	GmGELP149	1473.4	62.6514	-4.55566	1.75e-183	Down	1.08e-184
LOC100780506	GmGELP64	156.935	6.56035	-4.58025	4.08e-20	Down	1.31e-20
LOC100795251	GmGELP78	181.857	7.13387	-4.67198	7.56e-23	Down	2.27e-23
LOC100793291	GmGELP138	114.505	4.31004	-4.73156	1.7e-14	Down	6.28e-15
LOC100800634	GmGELP43	915.093	34.3308	-4.73634	2.02e-112	Down	2.02e-113
LOC100819691	GmGELP11	523.677	18.4522	-4.82681	1.83e-64	Down	2.92e-65
LOC100813566	GmGELP82	42.5842	1.49327	-4.83377	2.96e-06	Down	1.48e-06
LOC100816816	GmGELP97	1237.1	36.597	-5.07909	2.29e-145	Down	1.79e-146
LOC100807720	GmGELP193	53.78	1.49792	-5.16604	2.62e-07	Down	1.24e-07
LOC100812062	GmGELP127	34.7513	0.937915	-5.21147	2.59e-05	Down	1.36e-05
LOC100776334	GmGELP172	516.182	10.5411	-5.61379	4.01e-55	Down	7.15e-56
LOC100812886	GmGELP25	22.1386	0.376539	-5.87762	0.000416514	Down	0.000237029
LOC100819256	GmGELP167	259.766	3.76349	-6.109	2.78e-25	Down	7.95e-26
LOC100815323	GmGELP75	28.0784	0.389162	-6.17295	0.000155532	Down	8.6e-05
LOC100791595	GmGELP79	1473.29	17.3771	-6.40571	1.1e-122	Down	1.01e-123
LOC102668807	GmGELP121	791.28	7.18703	-6.78265	1.38e-59	Down	2.34e-60
LOC100801870	GmGELP178	64.9103	0.420359	-7.27068	1.58e-06	Down	7.77e-07
LOC100775689	GmGELP124	525.198	3.2492	-7.33663	3.37e-33	Down	8.32e-34
LOC100800835	GmGELP1	2269.99	12.8888	-7.46043	1.23e-127	Down	1.09e-128
LOC100819292	GmGELP188	3236.37	16.3009	-7.63328	2.41e-169	Down	1.61e-170
LOC100781033	GmGELP96	111.623	0.4444	-7.97256	4.05e-08	Down	1.85e-08
LOC100777710	GmGELP163	1762.34	6.12468	-8.16865	2.28e-75	Down	3.19e-76
LOC100793845	GmGELP148	230.759	0.485882	-8.89157	1.42e-10	Down	5.92e-11
LOC100816078	GmGELP33	3689.53	0.667967	-12.4314	6.44e-25	Down	1.86e-25
