# Supplementary material for: Genome-Wide Identification, Evolution, and Expression of GDSL-Type Esterase/Lipase Gene Family in Soybean
Source: Front Plant Sci. 2020 Jun 25;11:726. doi: 10.3389/fpls.2020.00726 (PMC7332888; doi:10.3389/fpls.2020.00726)
Supplement: TABLE S6 — FPKM values under NaCl treatment of soybean GELP genes. [file Table_6.XLSX]

## Sheet: Sheet1
Table S6. FPKM values under NaCl treatment of soybean GELP genes.
Gene ID	Gene Name	CK_treat-Expression	NaCl_treat-Expression	log2FoldChange(NaCl_treat/CK_treat)	Padj	Up/Down-Regulation	Pvalue
LOC100790553	GmGELP22	845.93	401.74	-1.07428	2.03e-15	Down	2.34e-16
LOC100790145	GmGELP74	218.554	1388.15	2.6671	5.8e-89	Up	1.09e-90
LOC100777710	GmGELP163	1975.8	200.019	-3.30423	2.07e-149	Down	1.99e-151
LOC100776334	GmGELP172	578.451	184.238	-1.65062	2.19e-22	Down	1.84e-23
LOC100802921	GmGELP179	724.62	274.599	-1.3999	1.62e-17	Down	1.69e-18
LOC100801228	GmGELP141	18.5948	63.0378	1.76132	0.000564474	Up	0.000168093
LOC100816078	GmGELP33	4138.06	224.274	-4.20562	0	Down	0
LOC100801497	GmGELP177	2088.12	744.188	-1.48846	3.9e-56	Down	1.27e-57
LOC100819292	GmGELP188	3629.23	1611.12	-1.1716	4.77e-39	Down	2.32e-40
LOC100777186	GmGELP162	56.5633	19.6637	-1.52433	0.00403871	Down	0.00138271
LOC102667991	GmGELP160	590.281	143.692	-2.03842	2.59e-32	Down	1.53e-33
LOC100819256	GmGELP167	290.64	61.0123	-2.25206	2.87e-18	Down	2.88e-19
LOC100785435	GmGELP173	481.545	204.893	-1.2328	2.58e-12	Down	3.56e-13
LOC100805853	GmGELP149	1652.1	693.596	-1.25214	1.15e-29	Down	7.35e-31
LOC100780781	GmGELP176	1689.45	696.316	-1.27874	5.91e-38	Down	2.97e-39
LOC100818373	GmGELP21	1157.92	513.728	-1.17246	8.01e-22	Down	6.89e-23
LOC100791595	GmGELP79	1651.88	413.804	-1.99709	2.11e-78	Down	4.65e-80
LOC100804919	GmGELP102	127.681	447.6	1.80967	3.19e-21	Up	2.82e-22
LOC100793845	GmGELP148	258.189	34.1914	-2.91672	5.9e-23	Down	4.85e-24
LOC100812154	GmGELP180	5307.81	2341.59	-1.18063	1.59e-72	Down	3.87e-74
LOC102668807	GmGELP121	886.794	130.728	-2.76203	9.27e-66	Down	2.57e-67
LOC100801870	GmGELP178	72.2789	21.7985	-1.72935	0.000345326	Down	9.97e-05
LOC100813037	GmGELP28	1.14494	14.5413	3.66681	0.000834154	Up	0.00025484
LOC100819691	GmGELP110	587.012	253.499	-1.21141	1.25e-14	Down	1.51e-15
LOC100800835	GmGELP100	2544.99	658.494	-1.95042	4.29e-67	Down	1.15e-68
LOC100783310	GmGELP187	164.71	79.9127	-1.04343	0.000898145	Down	0.000275869
LOC100816816	GmGELP97	1387.25	625.189	-1.14987	4.41e-27	Down	3.09e-28
LOC100795251	GmGELP78	203.389	68.0015	-1.58061	2.99e-08	Down	5.6e-09
LOC100812886	GmGELP25	24.1356	1.12349	-4.42511	1.37e-05	Down	3.29e-06
LOC100781033	GmGELP96	124.599	21.4076	-2.5411	1.26e-10	Down	1.95e-11
